# Supplementary material
Source: PubMed Central journal article supplement (PMC4291292)
Supplement: NIHMS641529-supplement-8.pdf [file NIHMS641529-supplement-8.pdf]

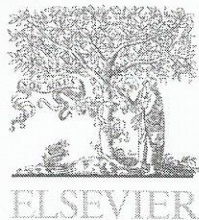

***Neurotoxicology and Teratology***  
**Conflict of Interest Policy**

Manuscript number (if applicable): NTT-14-96

Article Title: Behavioral Assessment of NIH Swiss Mice  
Acutely Intoxicated with Tetramethylenedisulfotetramine

Author name: Kyle Puhger

**Declarations**

*Neurotoxicology and Teratology* requires that all authors sign a declaration of conflicting interests. If you have nothing to declare in any of these categories then this should be stated.

**Conflict of Interest**

A conflicting interest exists when professional judgement concerning a primary interest (such as patient's welfare or the validity of research) may be influenced by a secondary interest (such as financial gain or personal rivalry). It may arise for the authors when they have financial interest that may influence their interpretation of their results or those of others. Examples of potential conflicts of interest include employment, consultancies, stock ownership, honoraria, paid expert testimony, patent applications/registrations, and grants or other funding.

**Please state any competing interests**

I have no competing interests to declare.

**Funding Source**

All sources of funding should also be acknowledged and you should declare any involvement of study sponsors in the study design; collection, analysis and interpretation of data; the writing of the manuscript; the decision to submit the manuscript for publication. If the study sponsors had no such involvement, this should be stated.

**Please state any sources of funding for your research**

This research was funded by the CounterACT program, National Institutes of Health Office of the Director and the National Institute of Neurological Disorders and Stroke (U54 NS079202), by the NIEHS Superfund Research Program (P42ES004699) and by the MIND Institute Intellectual and Developmental Disabilities Research Center (U54 HD079125). The funding agencies were not involved in the study design, in the collection, analysis, and interpretation of data, in the writing of the report or in the decision to submit the paper for publication.

**Signature** (a scanned signature is acceptable,  
but each author must sign)

**Print name**

Kyle Puhger

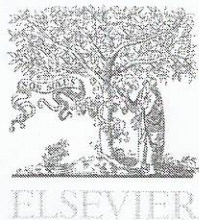

***Neurotoxicology and Teratology***  
**Conflict of Interest Policy**

Manuscript number (if applicable): NTT-14-96

Article Title: Behavioral Assessment of NIH Swiss Mice  
Acutely Intoxicated with Tetramethylenedisulfotetramine

Author name: Jill Silverman

**Declarations**

*Neurotoxicology and Teratology* requires that all authors sign a declaration of conflicting interests. If you have nothing to declare in any of these categories then this should be stated.

**Conflict of Interest**

A conflicting interest exists when professional judgement concerning a primary interest (such as patient's welfare or the validity of research) may be influenced by a secondary interest (such as financial gain or personal rivalry). It may arise for the authors when they have financial interest that may influence their interpretation of their results or those of others. Examples of potential conflicts of interest include employment, consultancies, stock ownership, honoraria, paid expert testimony, patent applications/registrations, and grants or other funding.

**Please state any competing interests**

I have no competing interests to declare.

**Funding Source**

All sources of funding should also be acknowledged and you should declare any involvement of study sponsors in the study design; collection, analysis and interpretation of data; the writing of the manuscript; the decision to submit the manuscript for publication. If the study sponsors had no such involvement, this should be stated.

**Please state any sources of funding for your research**

This research was funded by the CounterACT program, National Institutes of Health Office of the Director and the National Institute of Neurological Disorders and Stroke (U54 NS079202), by the NIEHS Superfund Research Program (P42ES004699) and by the MIND Institute Intellectual and Developmental Disabilities Research Center (U54 HD079125). The funding agencies were not involved in the study design, in the collection, analysis, and interpretation of data, in the writing of the report or in the decision to submit the paper for publication.

**Signature** (a scanned signature is acceptable,  
but each author must sign)

**Print name**

Jill Silverman
